# Supplementary material for: Loss of Stromal Galectin-1 Enhances Multiple Myeloma Development: Emphasis on a Role in Osteoclasts
Source: PubMed Central journal article supplement (PMC6406775; doi:10.3390/cancers11020261), 2019-02-23
Supplement: cancers-11-00261-s001.pdf [file cancers-11-00261-s001.pdf]

## Supplementary Materials: Loss of Stromal Galectin-1 Enhances Multiple Myeloma Development: Emphasis on a Role in Osteoclasts

Joséphine Muller, Elodie Duray, Margaux Lejeune, Sophie Dubois, Erwan Plougouven, Angélique Léonard, Paola Storti, Nicola Giuliani, Martine Cohen-Solal, Ute Hempel, Victor L. Thijssen, Yves Beguin, Roy Heusschen and Jo Caers

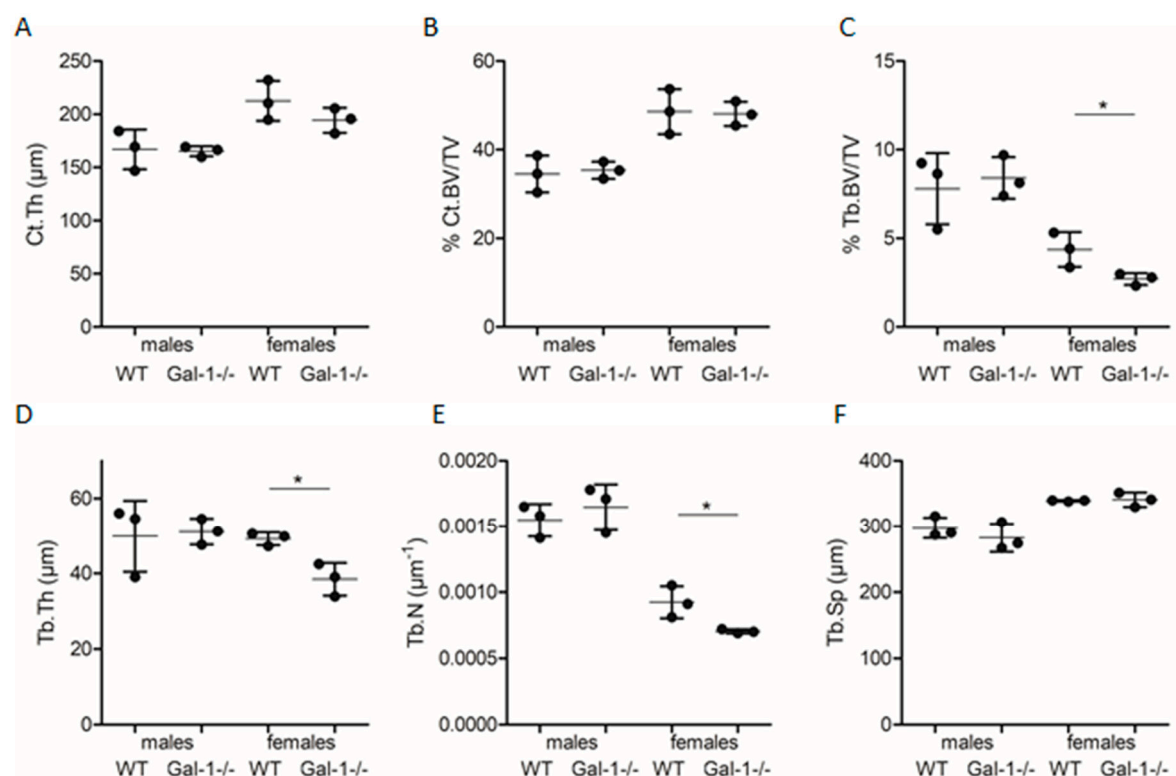

**Figure S1.** Bone  $\mu$ CT analysis of C57BL/6 WT and gal-1<sup>-/-</sup> MM-bearing mice. (A) Cortical thickness (B) Cortical bone volume (C) Trabecular bone volume (D) Trabecular thickness (E) Trabecular number (F) Trabecular separation. Data shown are the mean  $\pm$  standard error of three mice, and all results shown are representative of three independent experiments. \*  $p < 0.05$ .

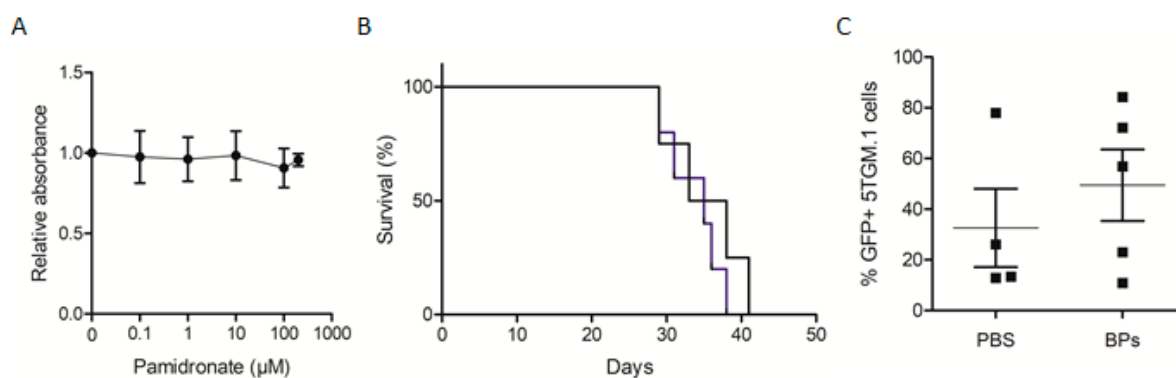

**Figure S2.** Pamidronate treatment of C57BL/6 gal-1<sup>-/-</sup> MM-bearing mice. (A) Proliferation assay of pamidronate on 5TGM.1 cells. (B) Survival curve of gal-1<sup>-/-</sup> MM-bearing mice treated with BPs (blue line) vs. PBS (black line). (C) 5TGM.1 GFP+ bone marrow infiltration of PBS/BPs gal-1<sup>-/-</sup> MM-bearing mice. Data (in A and C) are represented as mean  $\pm$  standard error. All results shown are representative of three ( $n = 3$ ) independent experiments.

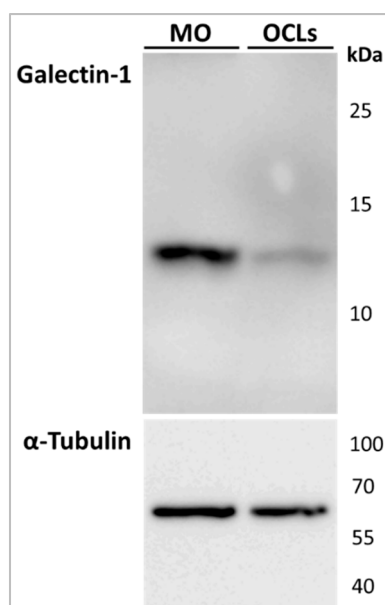

**Figure S3.** Western blotting analysis of galectin-1 in monocytes (MO) and osteoclasts (OCLs). Galectin-1 monomer expected around 14kDa;  $\alpha$ -tubulin, used as an endogenous control, expected around 55kDa. One representative western blot out of three ( $n = 3$ ) independent experiments is shown.

**Table S1.** Real-time primer sequences.

| Gene                                | Forward                | Reverse                |
|-------------------------------------|------------------------|------------------------|
| <i>Galectin-1</i>                   | TGTGTGTAACACCAAGGAAGAT | ACCTCTGTGATGCTCCCG     |
| Osteoclast function                 |                        |                        |
| <i>NFATc1</i>                       | TGAGGCTGGTCTCCGAGTT    | CGCTGGGAACACTCGATAGG   |
| <i>Cathepsin K</i>                  | CAGCAGAGGTGTGTAATG     | GCGTTGTCTTATTCCGAGC    |
| <i>TRAP</i>                         | TCCTGGCTCAAAAAGCAGTT   | ACATAGCCCACACCGTTCTC   |
| <i>Calcitonin R</i>                 | CTTCCATGCTGATCTTCTGG   | CAGATCTCCATTGGGCACAA   |
| <i>Integrin <math>\alpha</math></i> | GGCCTATTGTTTCAGCACAT   | GATTCCACAGCCCAAAGTGT   |
| <i>Integrin <math>\beta</math>3</i> | GTAATCGAGATGCCCCAGAG   | CTTCCATCCAGGGCAATATG   |
| References                          |                        |                        |
| <i><math>\beta</math>-actin</i>     | TCTGGCTCCTAGCACCATG    | AAAACGCAGCTCAGTAACAG   |
| <i><math>\beta</math>2MG</i>        | GCTACGTAACACAGTTCCAC   | TGATGCTTGATCACATGTCTCG |

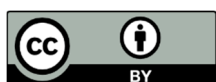

© 2019 by the authors. Licensee MDPI, Basel, Switzerland. This article is an open access article distributed under the terms and conditions of the Creative Commons Attribution (CC BY) license (<http://creativecommons.org/licenses/by/4.0/>).
